# Supplementary material for: Single-cell RNA-seq analysis identifies markers of resistance to targeted BRAF inhibitors in melanoma cell populations
Source: HighWire-hosted journal article supplement (doi:10.1101/gr.234062.117), 2018-07-30
Supplement: Supplemental_Fig_S5.pdf [file Supplemental_Fig_S5.pdf]

**A**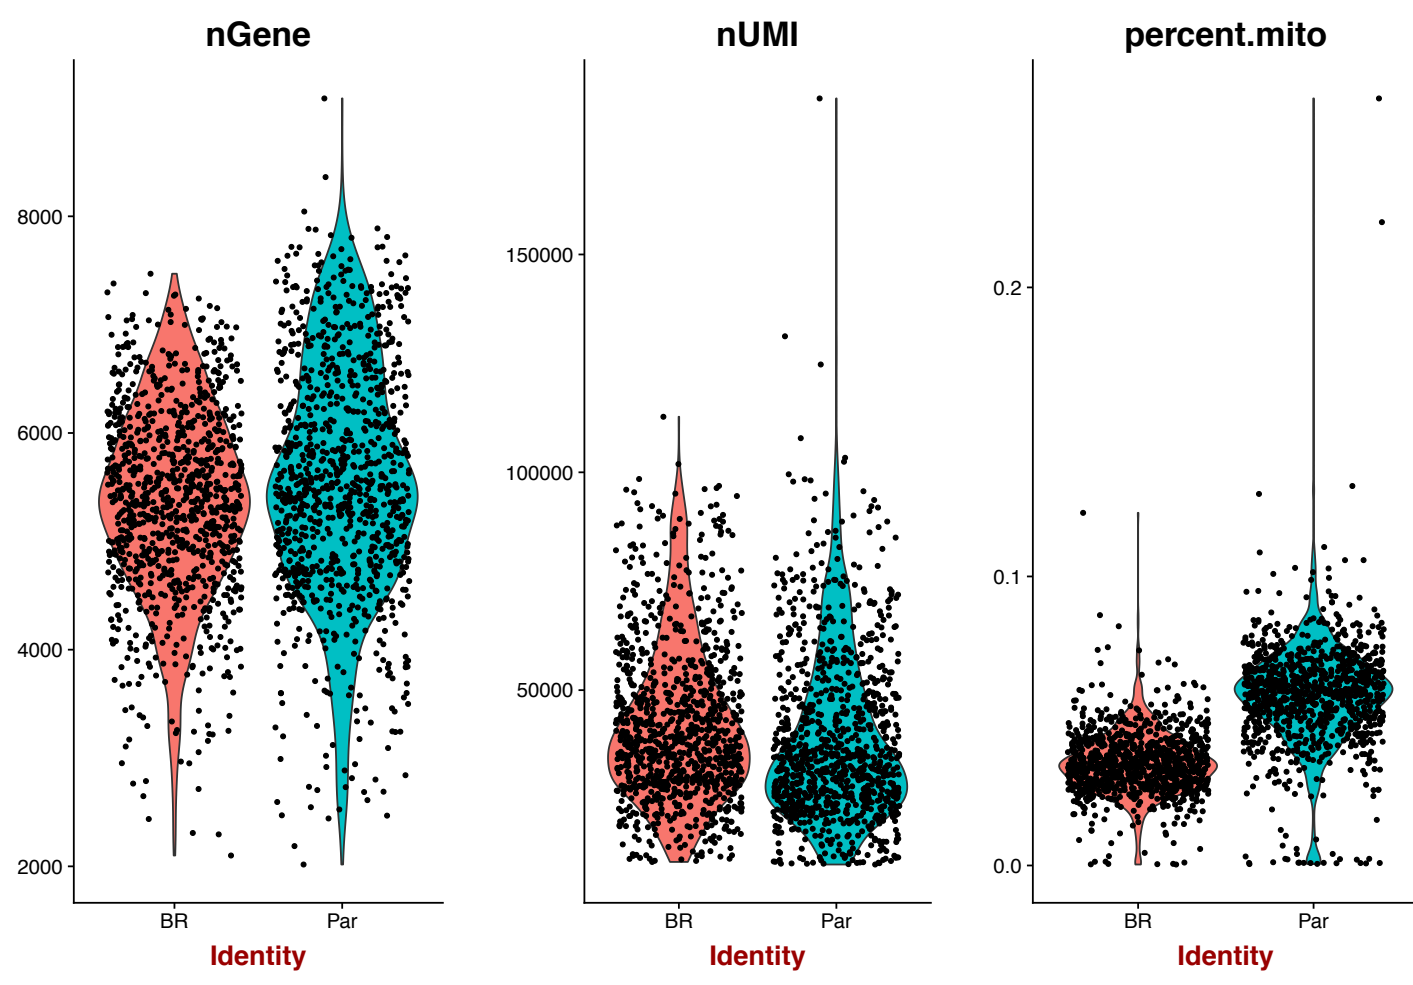**B**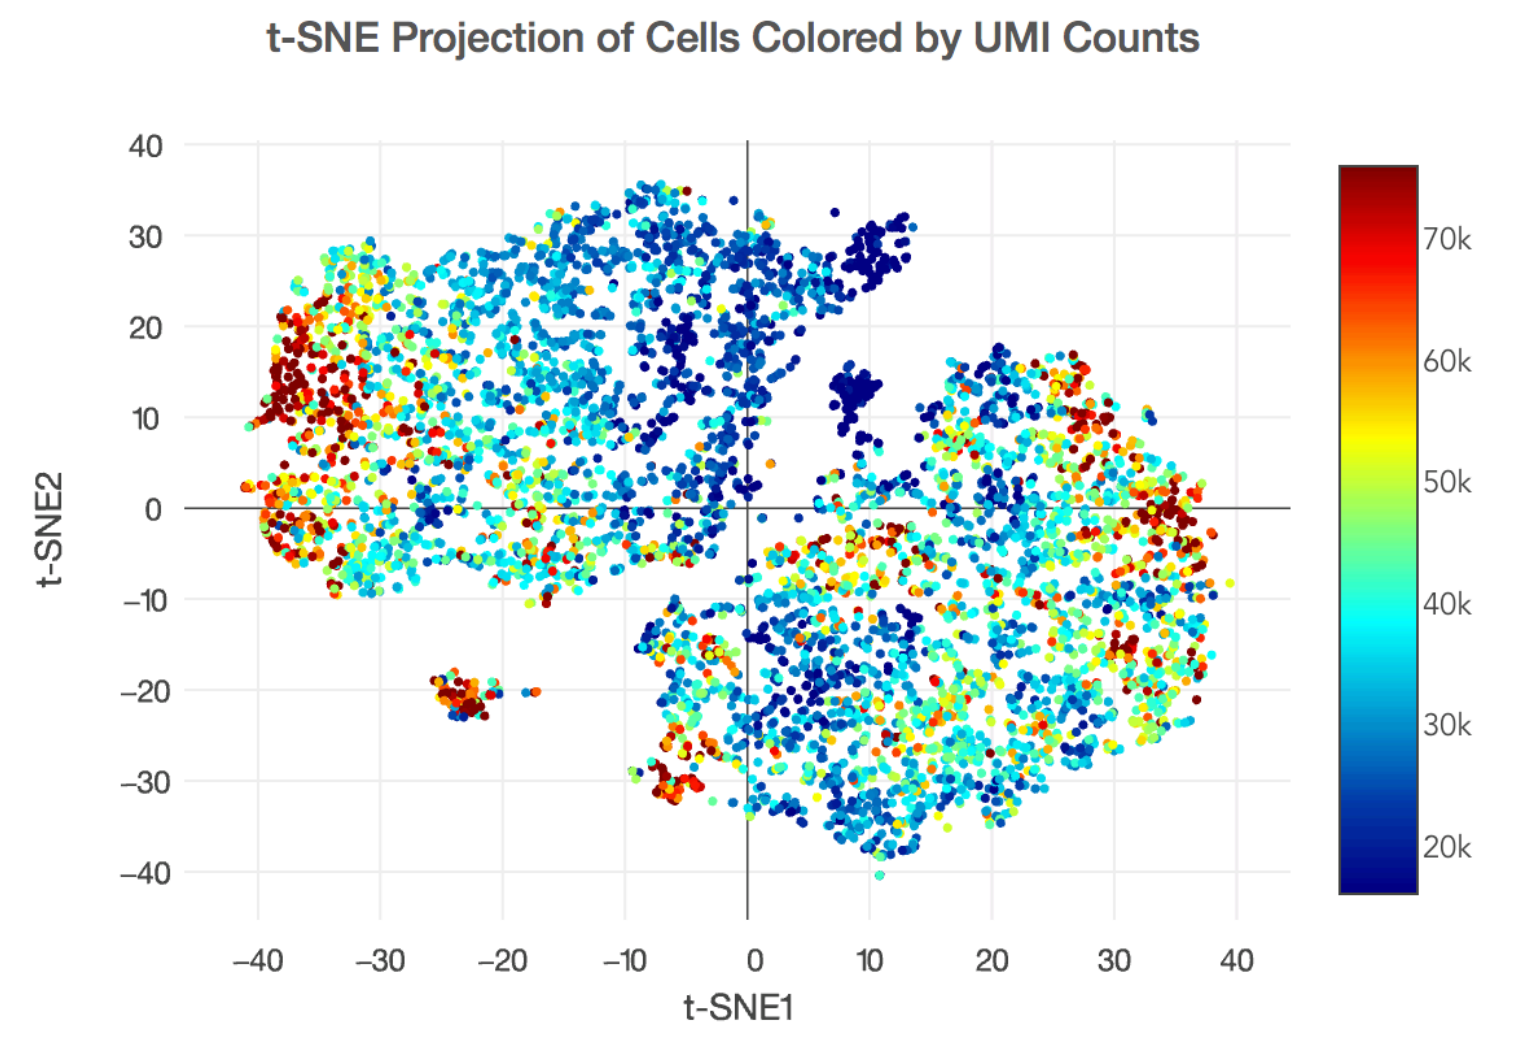**C**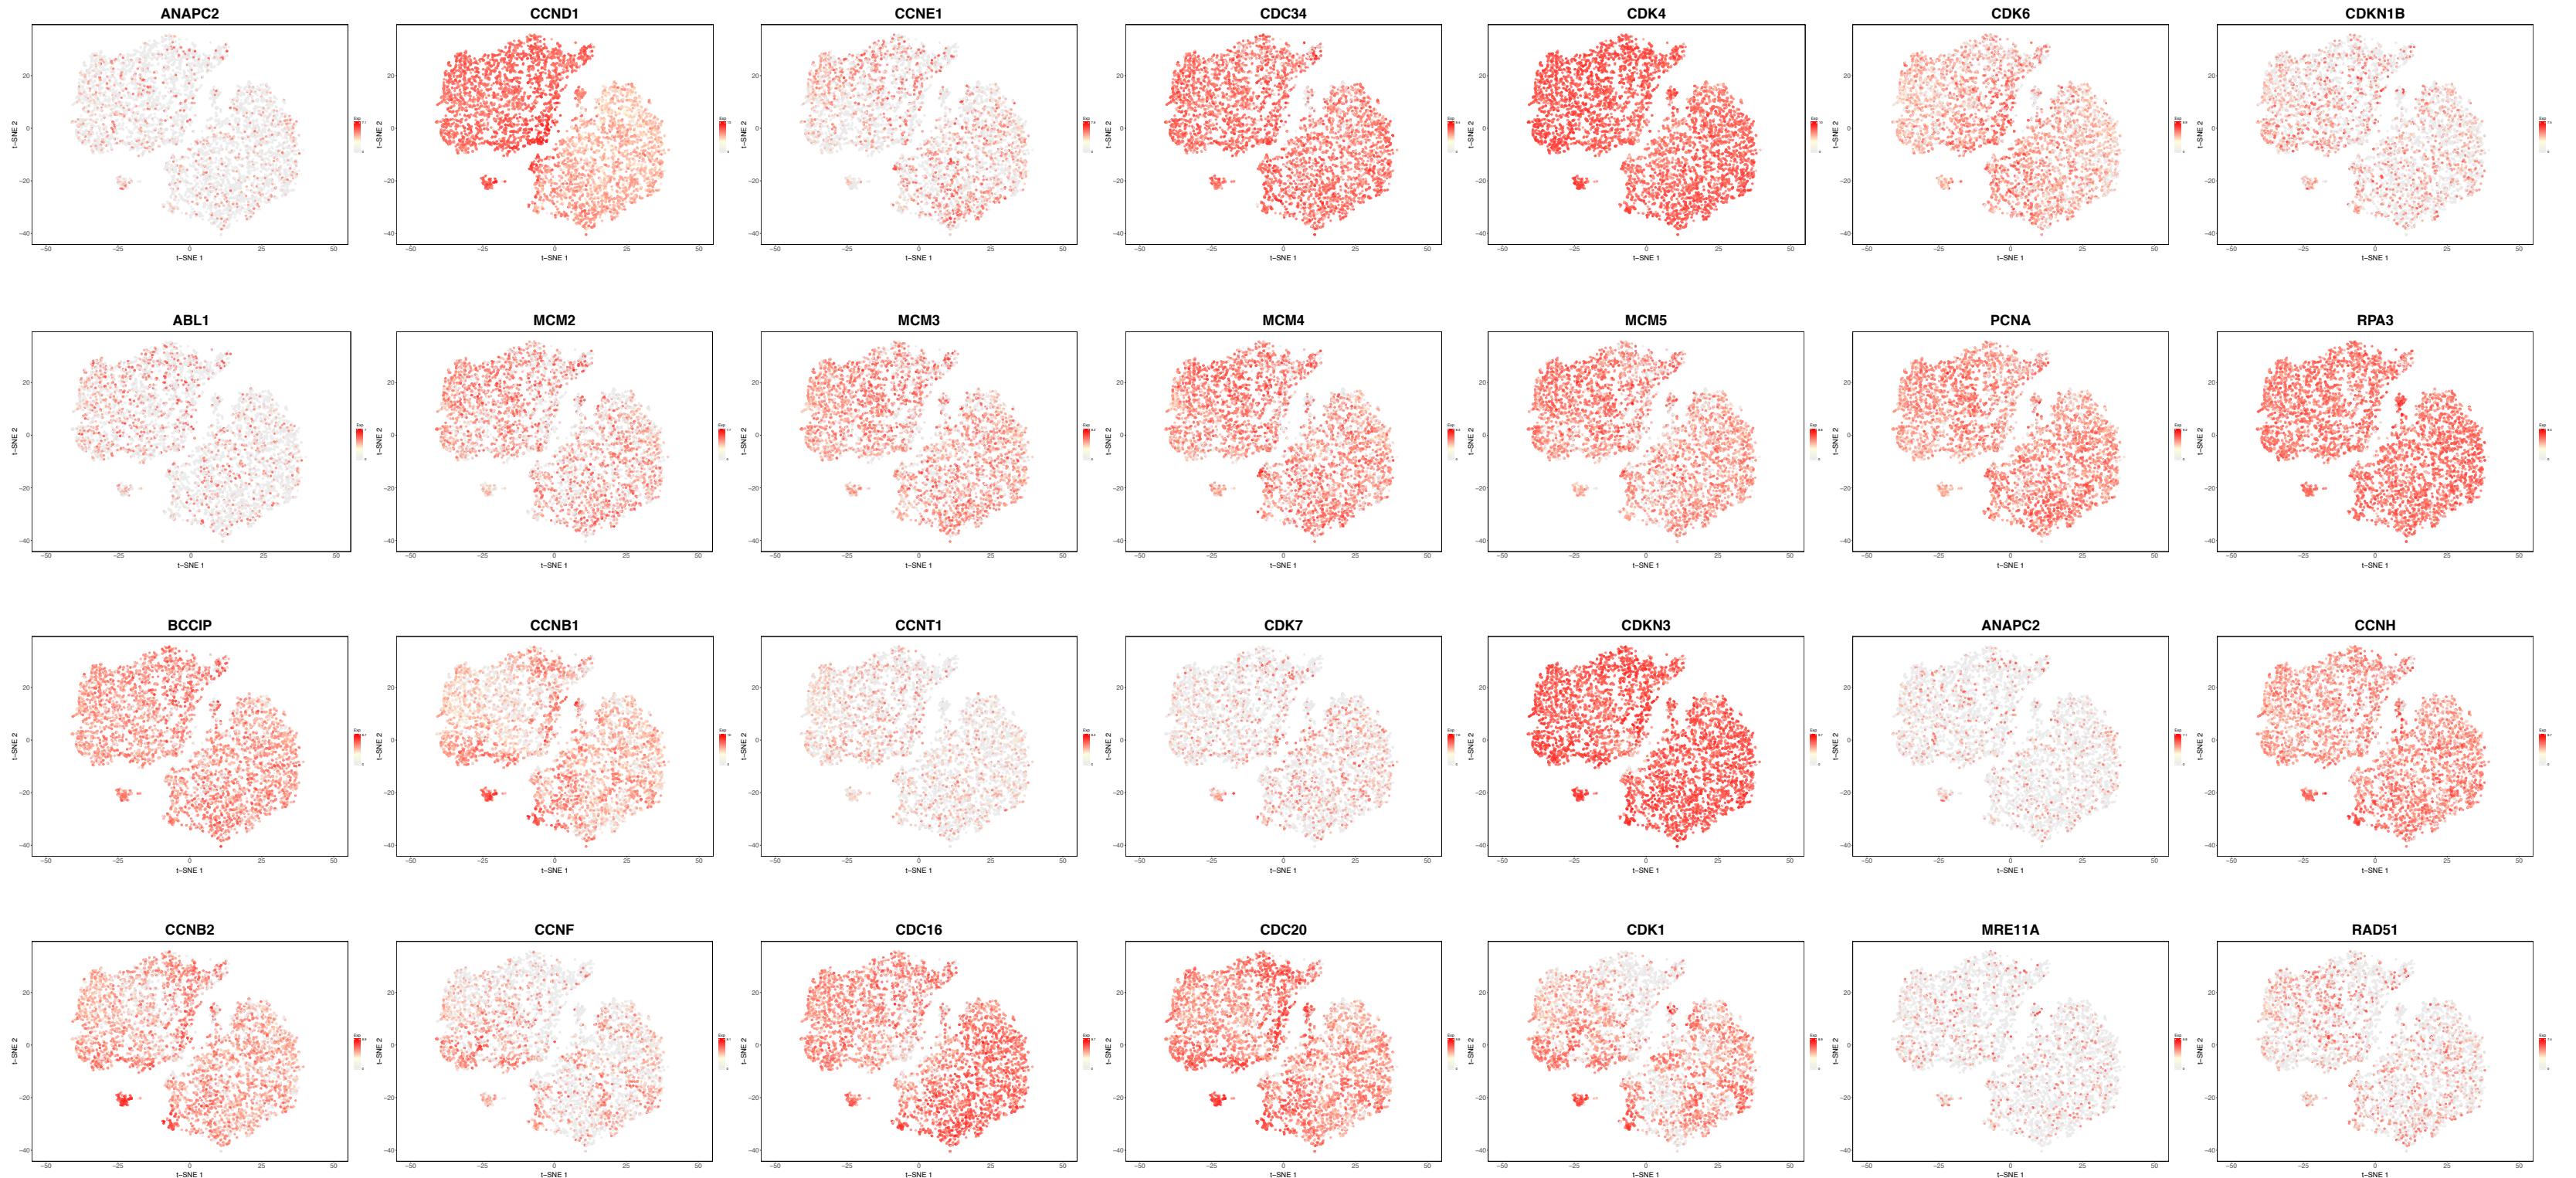

**Supplemental Fig. S5 | Quality check for single-cell RNA-Seq data from 10X system. A)** Expression of mitochondrially encoded genes was used as a proxy to evaluate the presence of dead cells in the 10X data. 451Lu parental and resistant cells have around 5% content, with no clear outlier subpopulation of cells dominated by mitochondrial expression patterns. **B)** Genes that are reported to be expressed in each of the cell cycle stage were downloaded from QIAGEN. t-SNE plots are used to display the expression pattern of these cell cycle specific genes, showing no clear correlation between clusters of cells and cell cycle stage.
