# Supplementary material for: Single-cell RNA-seq analysis identifies markers of resistance to targeted BRAF inhibitors in melanoma cell populations
Source: HighWire-hosted journal article supplement (doi:10.1101/gr.234062.117), 2018-07-30
Supplement: Supplemental_Fig_S8.pdf [file Supplemental_Fig_S8.pdf]

EGFR

NGFR

WNT5A

SERPINE1

POSTN

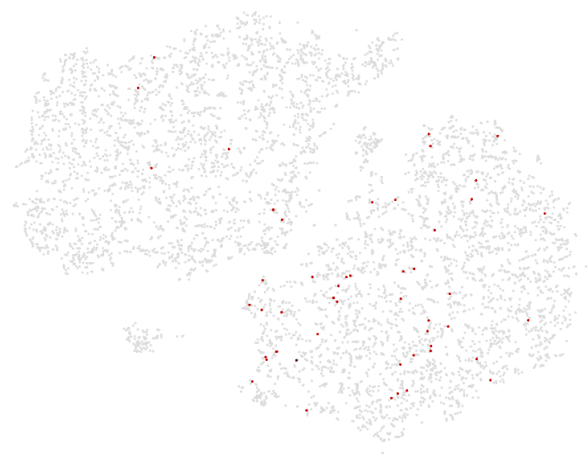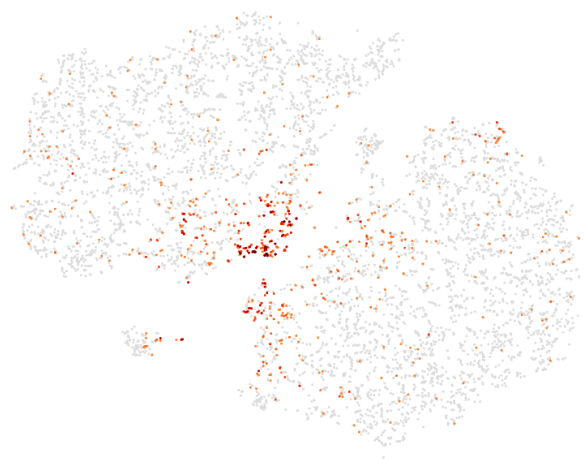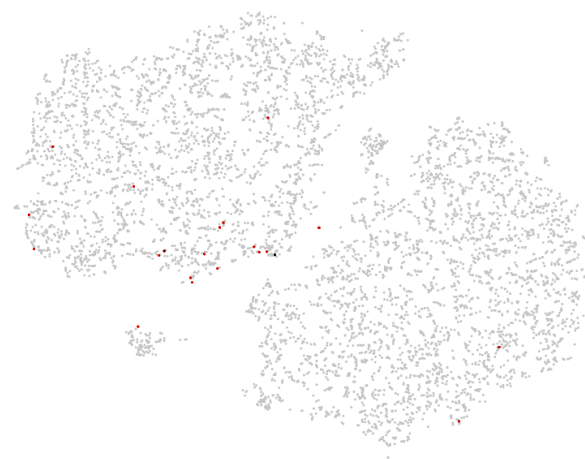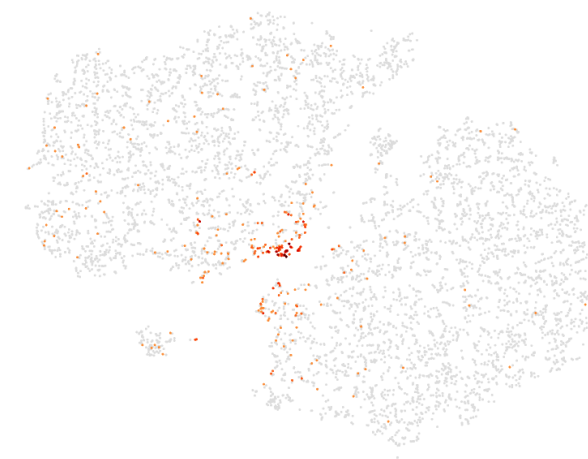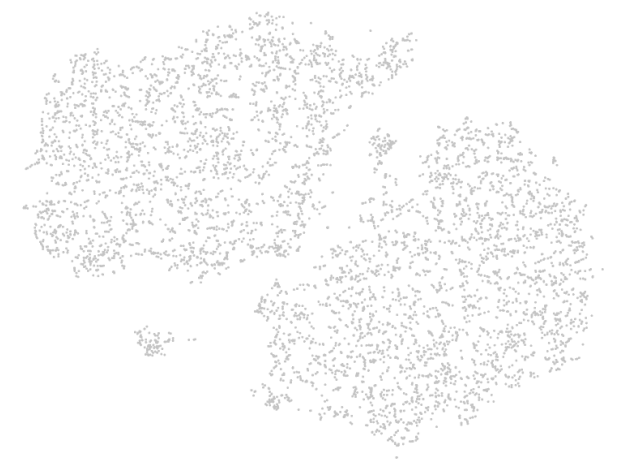

PDGFRB

NRG1

VEGFC

FOSL1

RUNX2

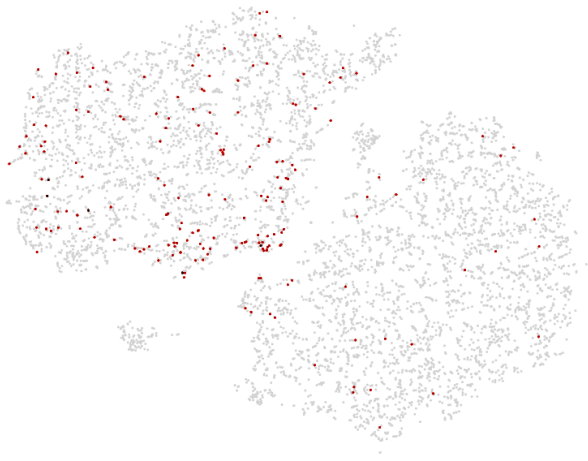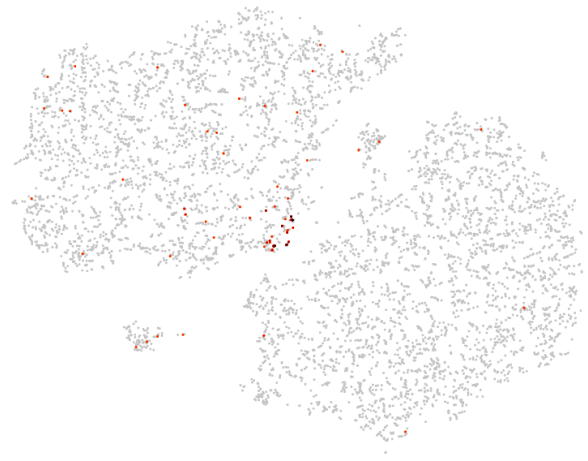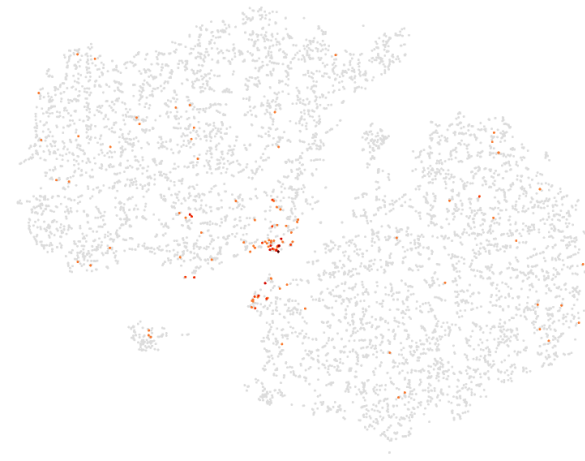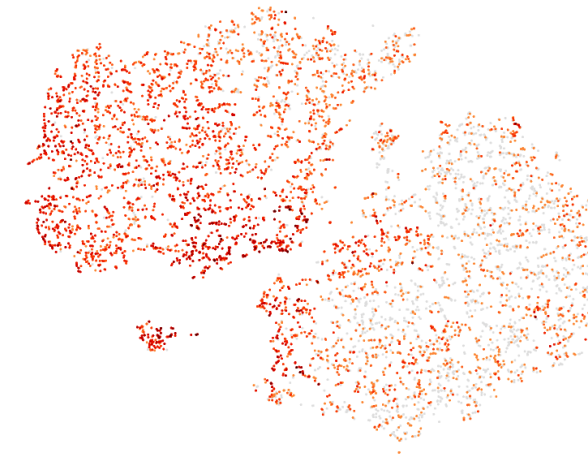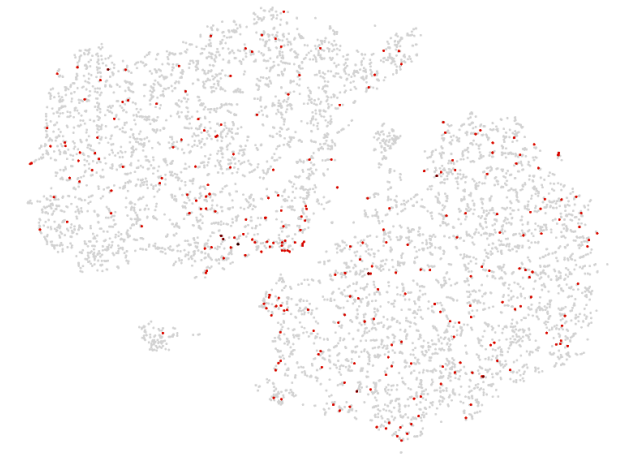

LOXL2

FGFR1

JUN

PDGFC

FN1

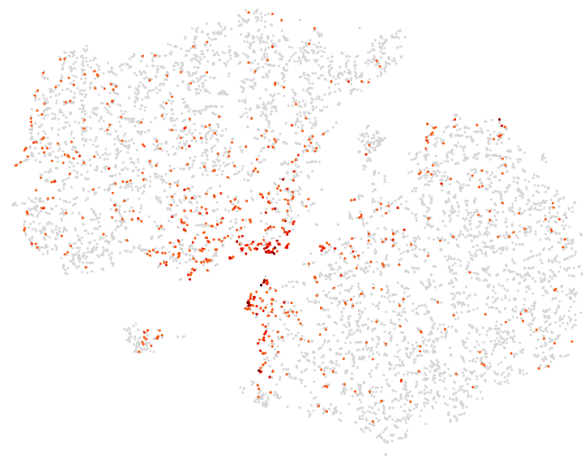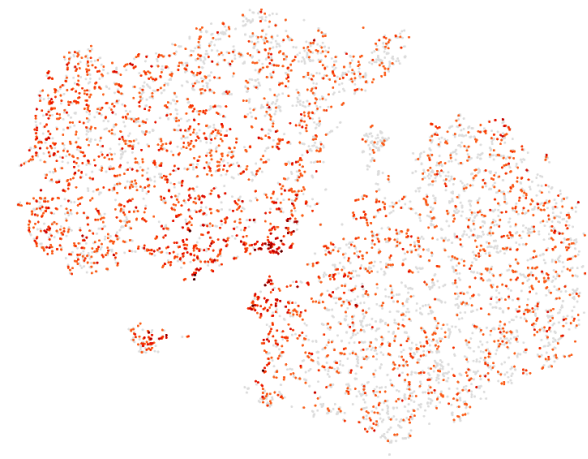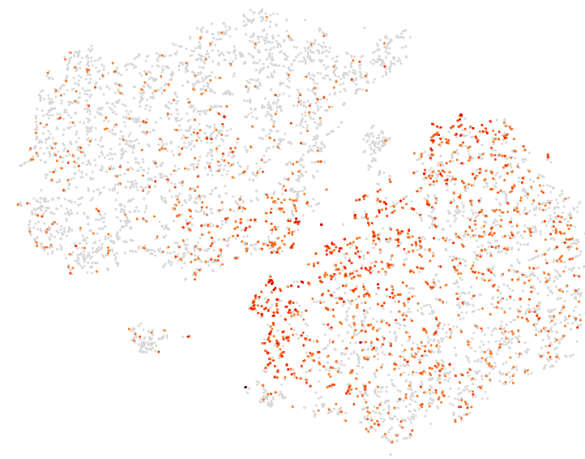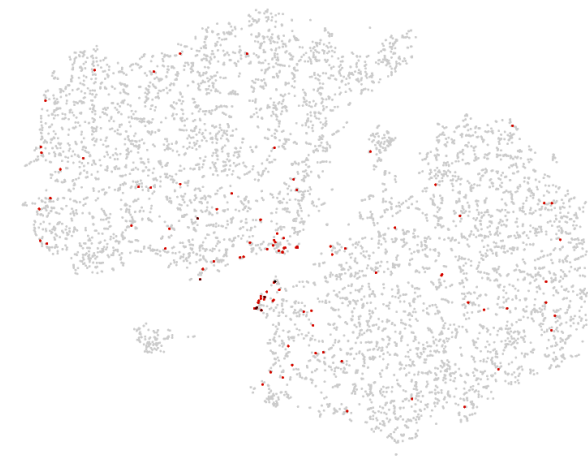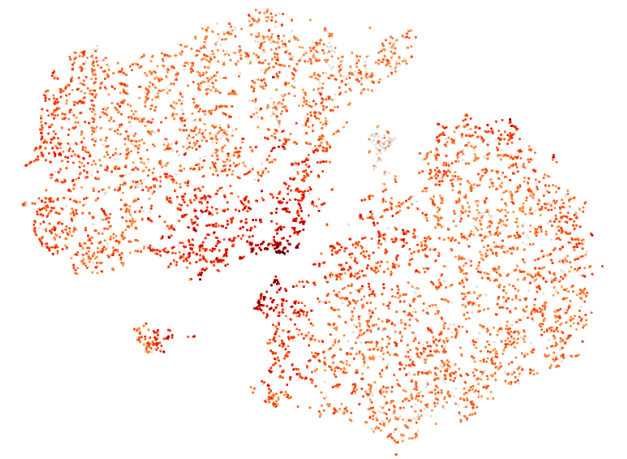

**Supplemental Fig. S8 | Alternative transcription factors/pathways to acquire resistant.** Published candidate marker genes that mark “pre-resistant” melanoma cells with a higher likelihood to develop BRAFi resistance from a recently published study (Shaffer et al., 2017). In our 451Lu cell line data, we did not observe a binary distribution of the expression of these marker genes between the parental and resistant populations, with the possible exception of JUN. Instead, these genes generally showed the greatest degree of differential expression at the interface between the two populations.
