# Supplementary material for: Single-cell RNA-seq analysis identifies markers of resistance to targeted BRAF inhibitors in melanoma cell populations
Source: HighWire-hosted journal article supplement (doi:10.1101/gr.234062.117), 2018-07-30
Supplement: Supplemental_Fig_S10.pdf [file Supplemental_Fig_S10.pdf]

**A**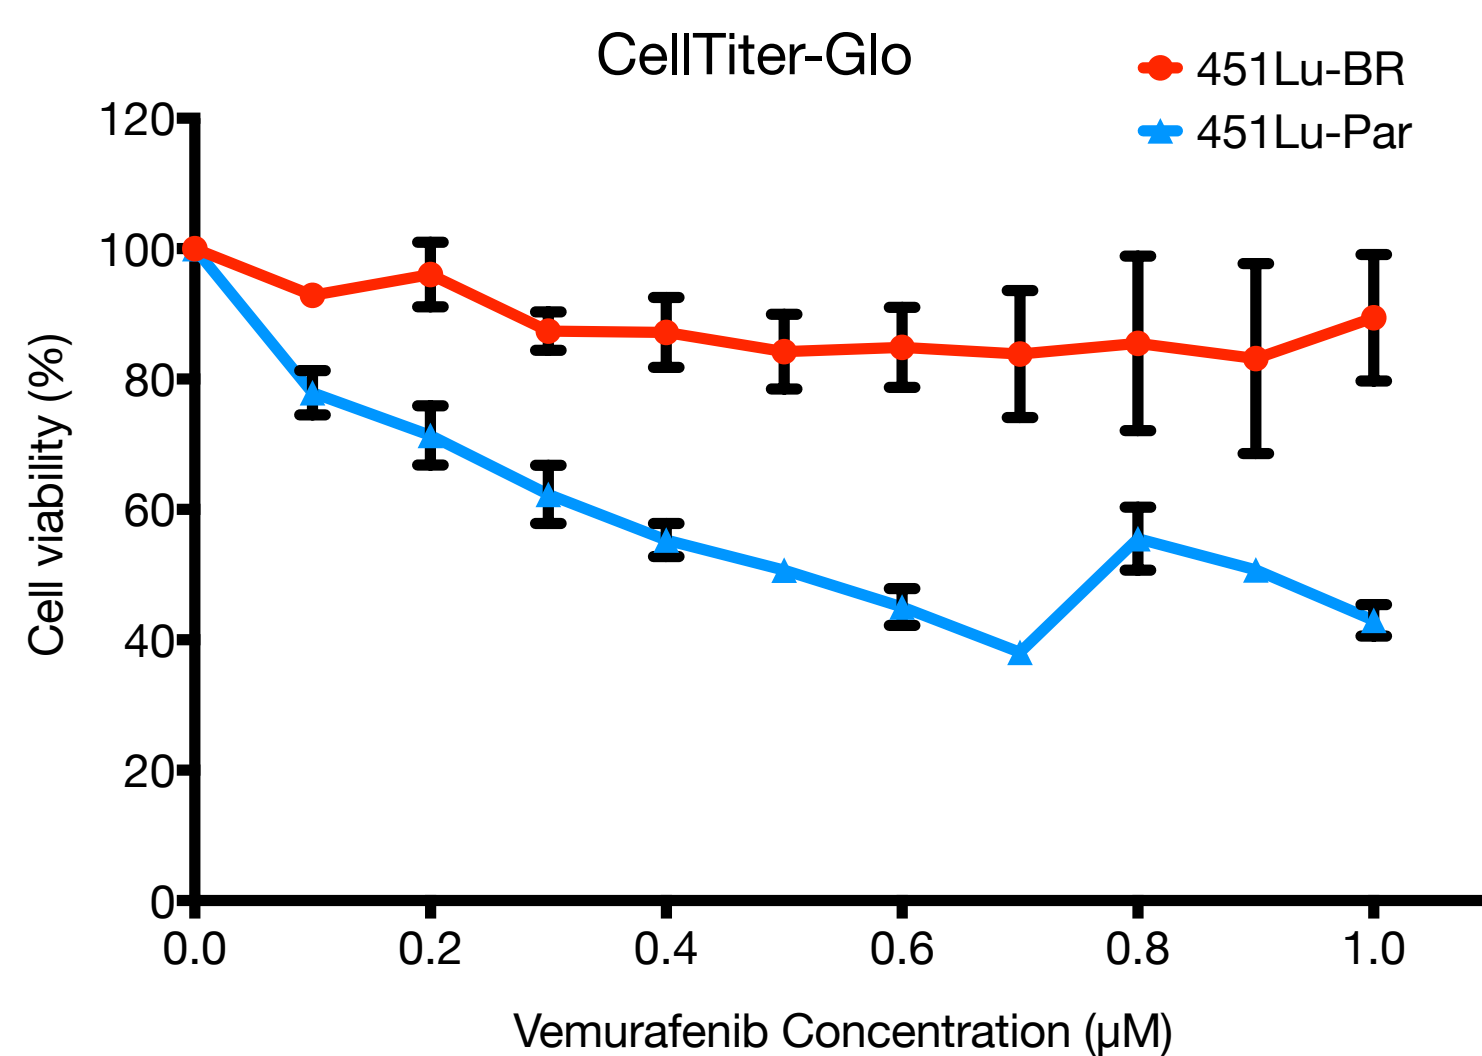**B**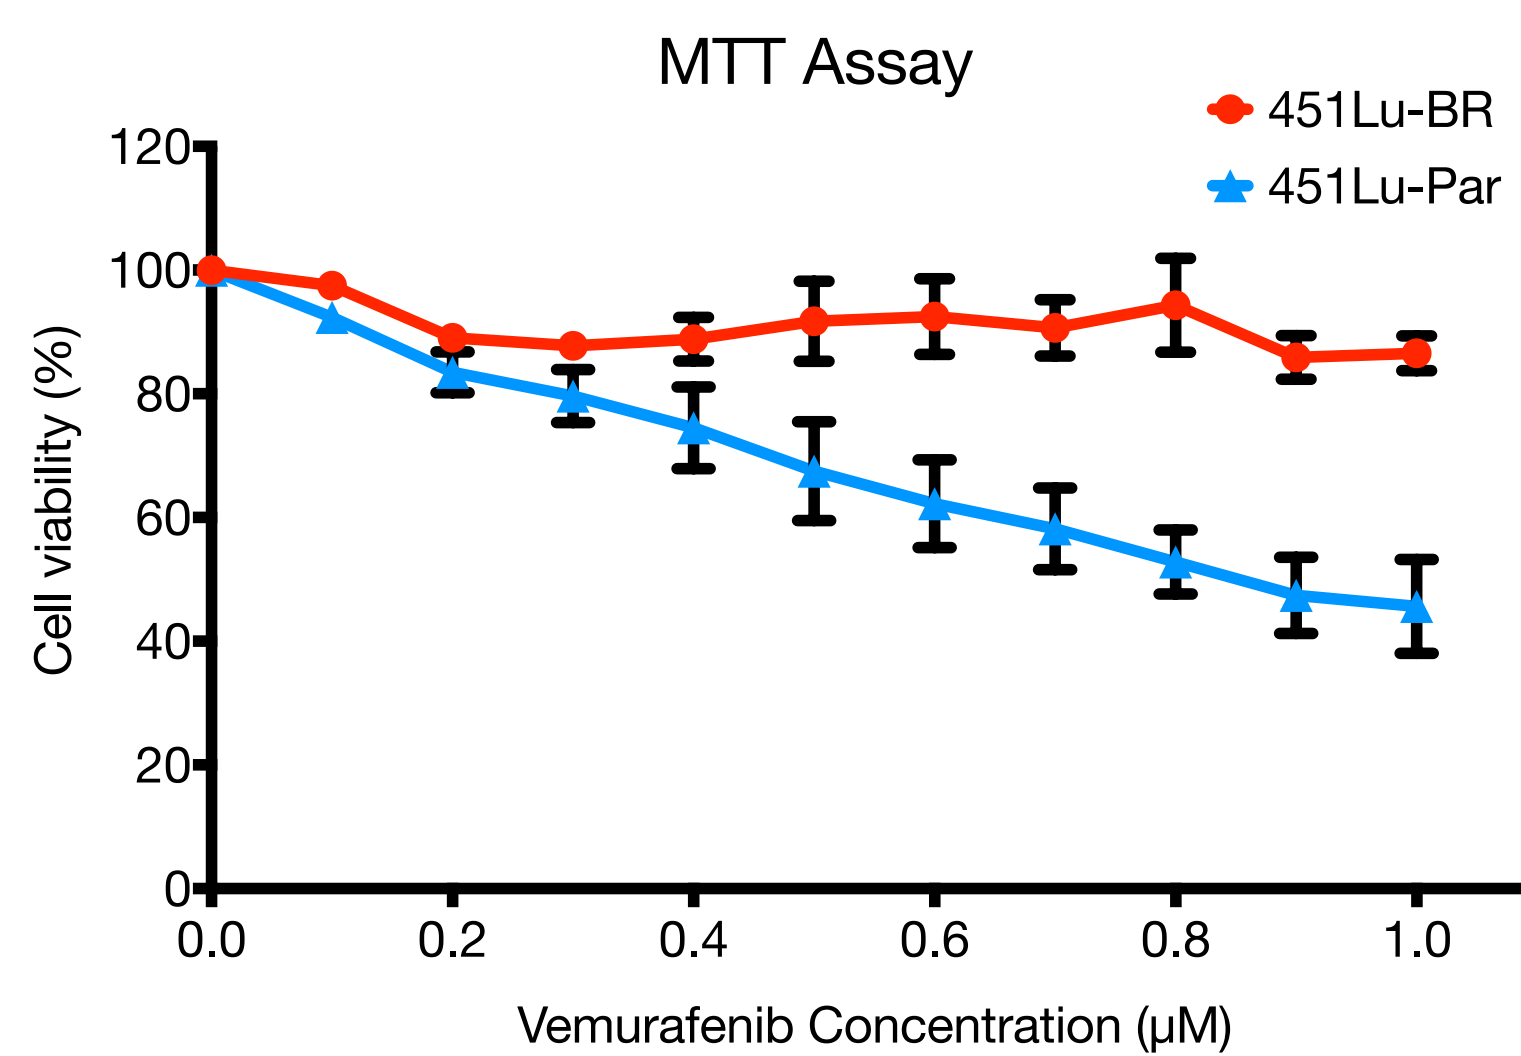

**Supplemental Fig. S10 | Differential drug sensitivity after drug treatment.** Drug sensitivity between 451Lu Parental and Resistant cells was measured through the use of CellTiter-Glo assays to assess metabolically active cells 72 hours following BRAFi application. **A)** 1000 cells were seeded per well and allowed to grow overnight. A series of drug concentrations from 0 to 1uM were added to the cells for a period of 72 hours before the assay was performed. The drug curve is comparable to the ones using MTT assay.
