# Supplementary material for: Single-cell RNA-seq analysis identifies markers of resistance to targeted BRAF inhibitors in melanoma cell populations
Source: HighWire-hosted journal article supplement (doi:10.1101/gr.234062.117), 2018-07-30
Supplement: Supplemental_Fig_S11.pdf [file Supplemental_Fig_S11.pdf]

**A**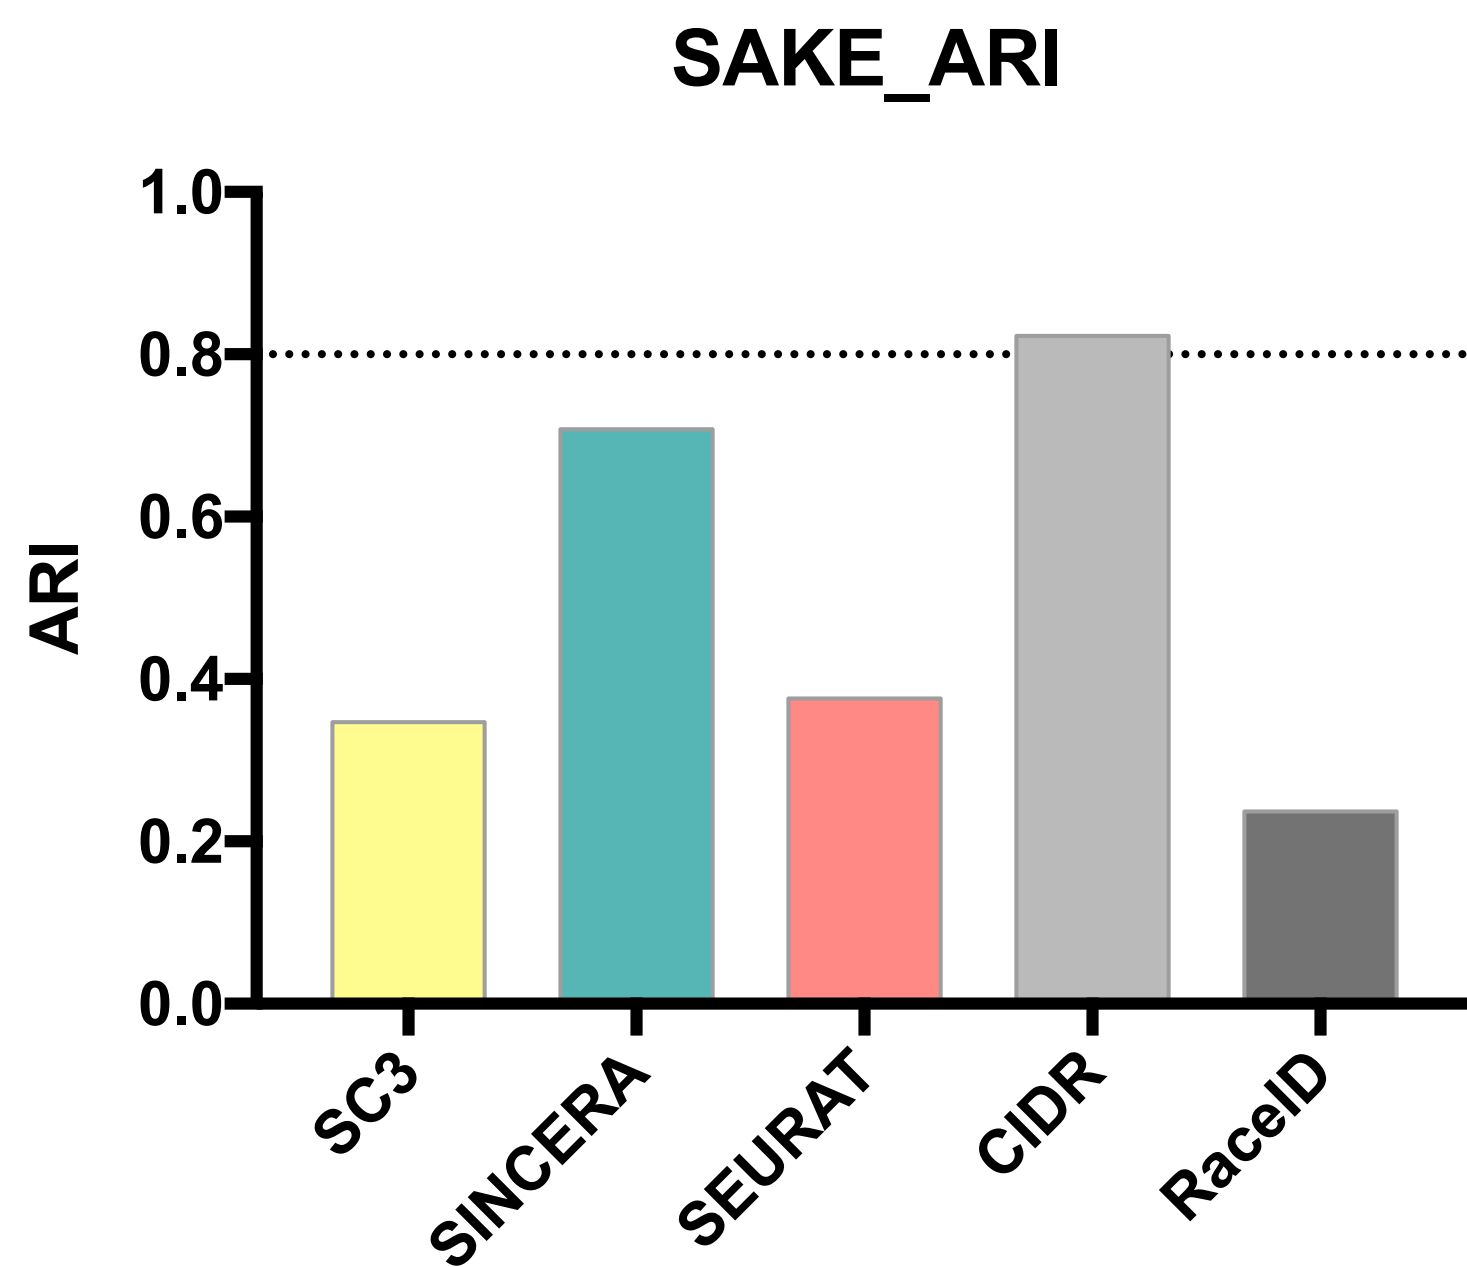**B**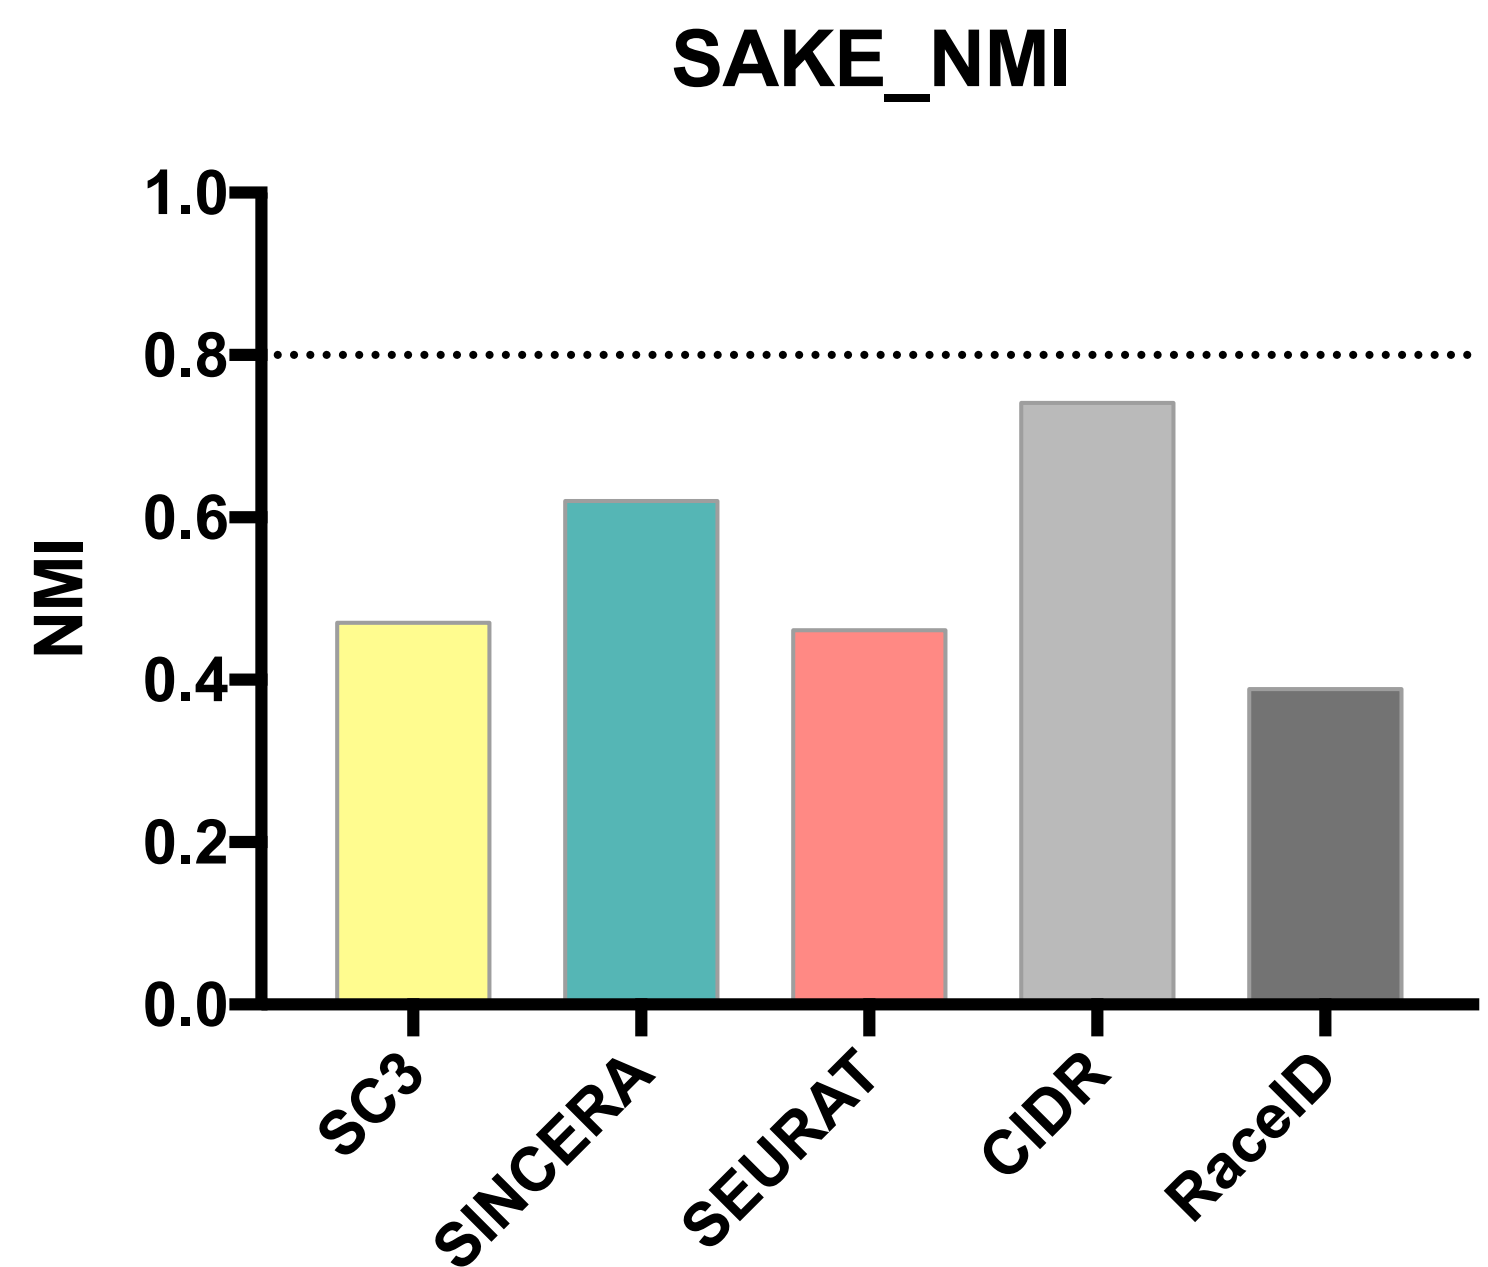**C**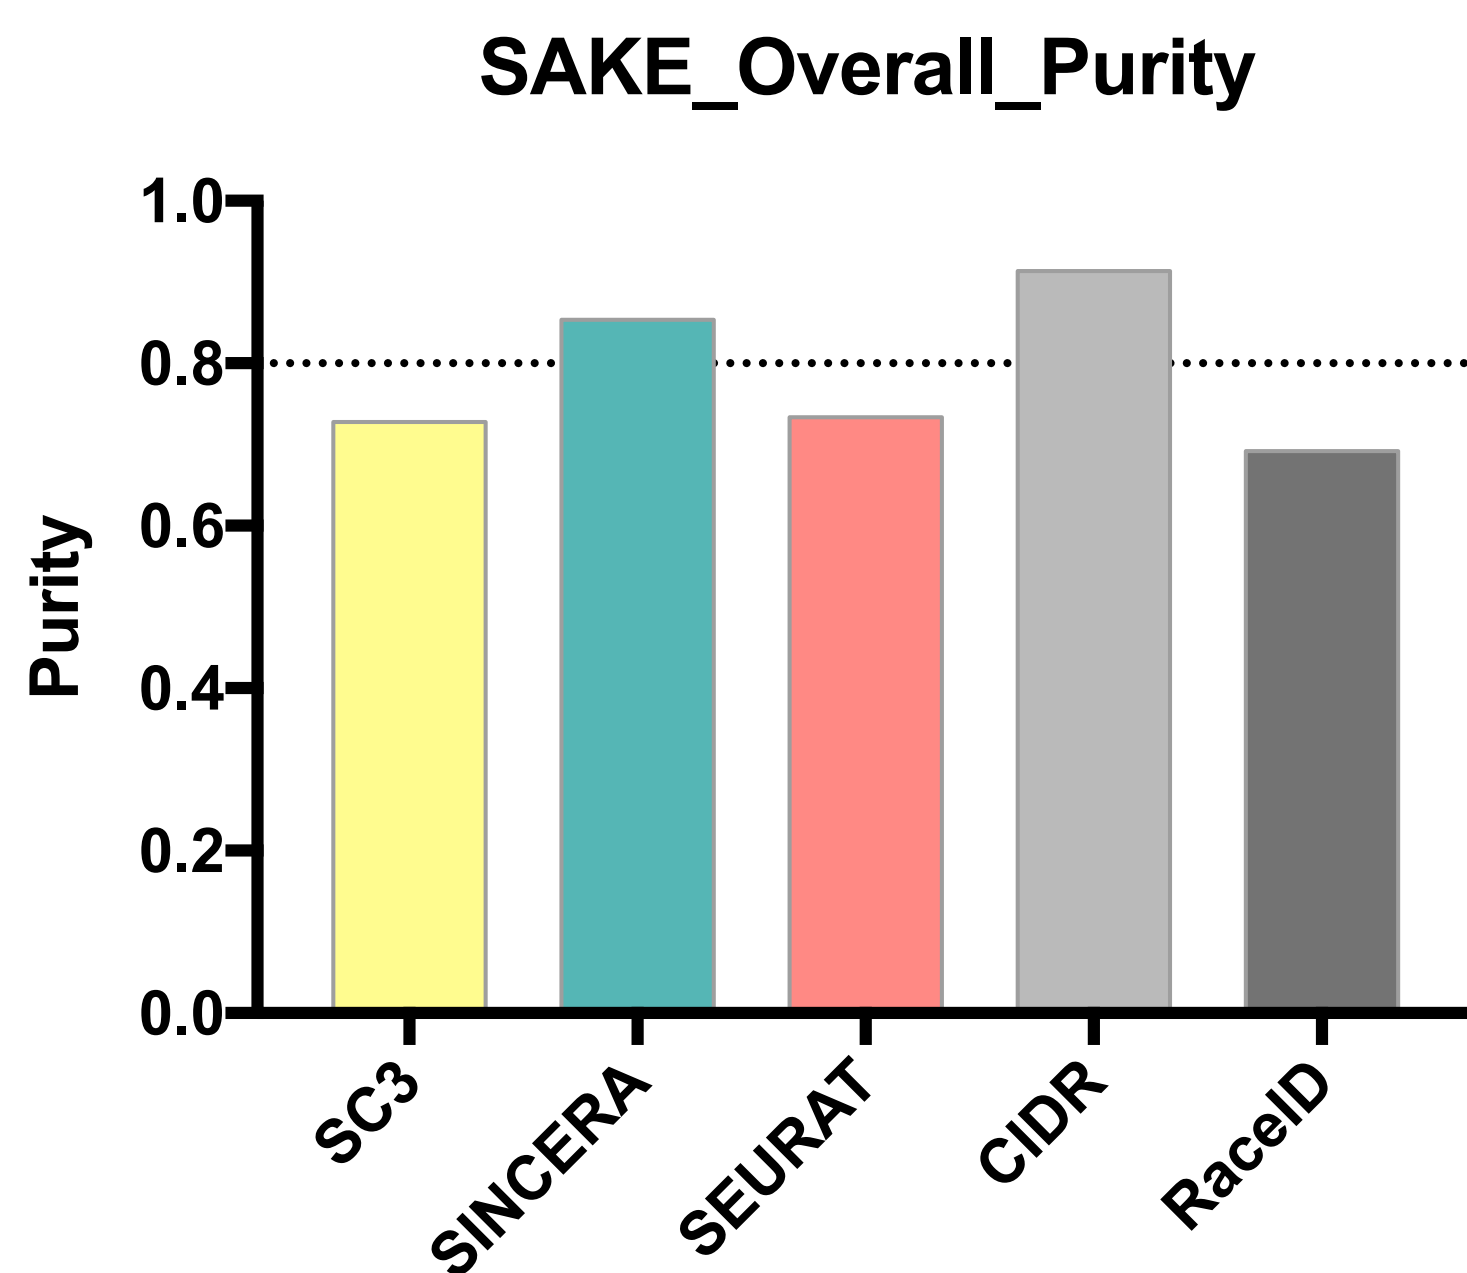**D**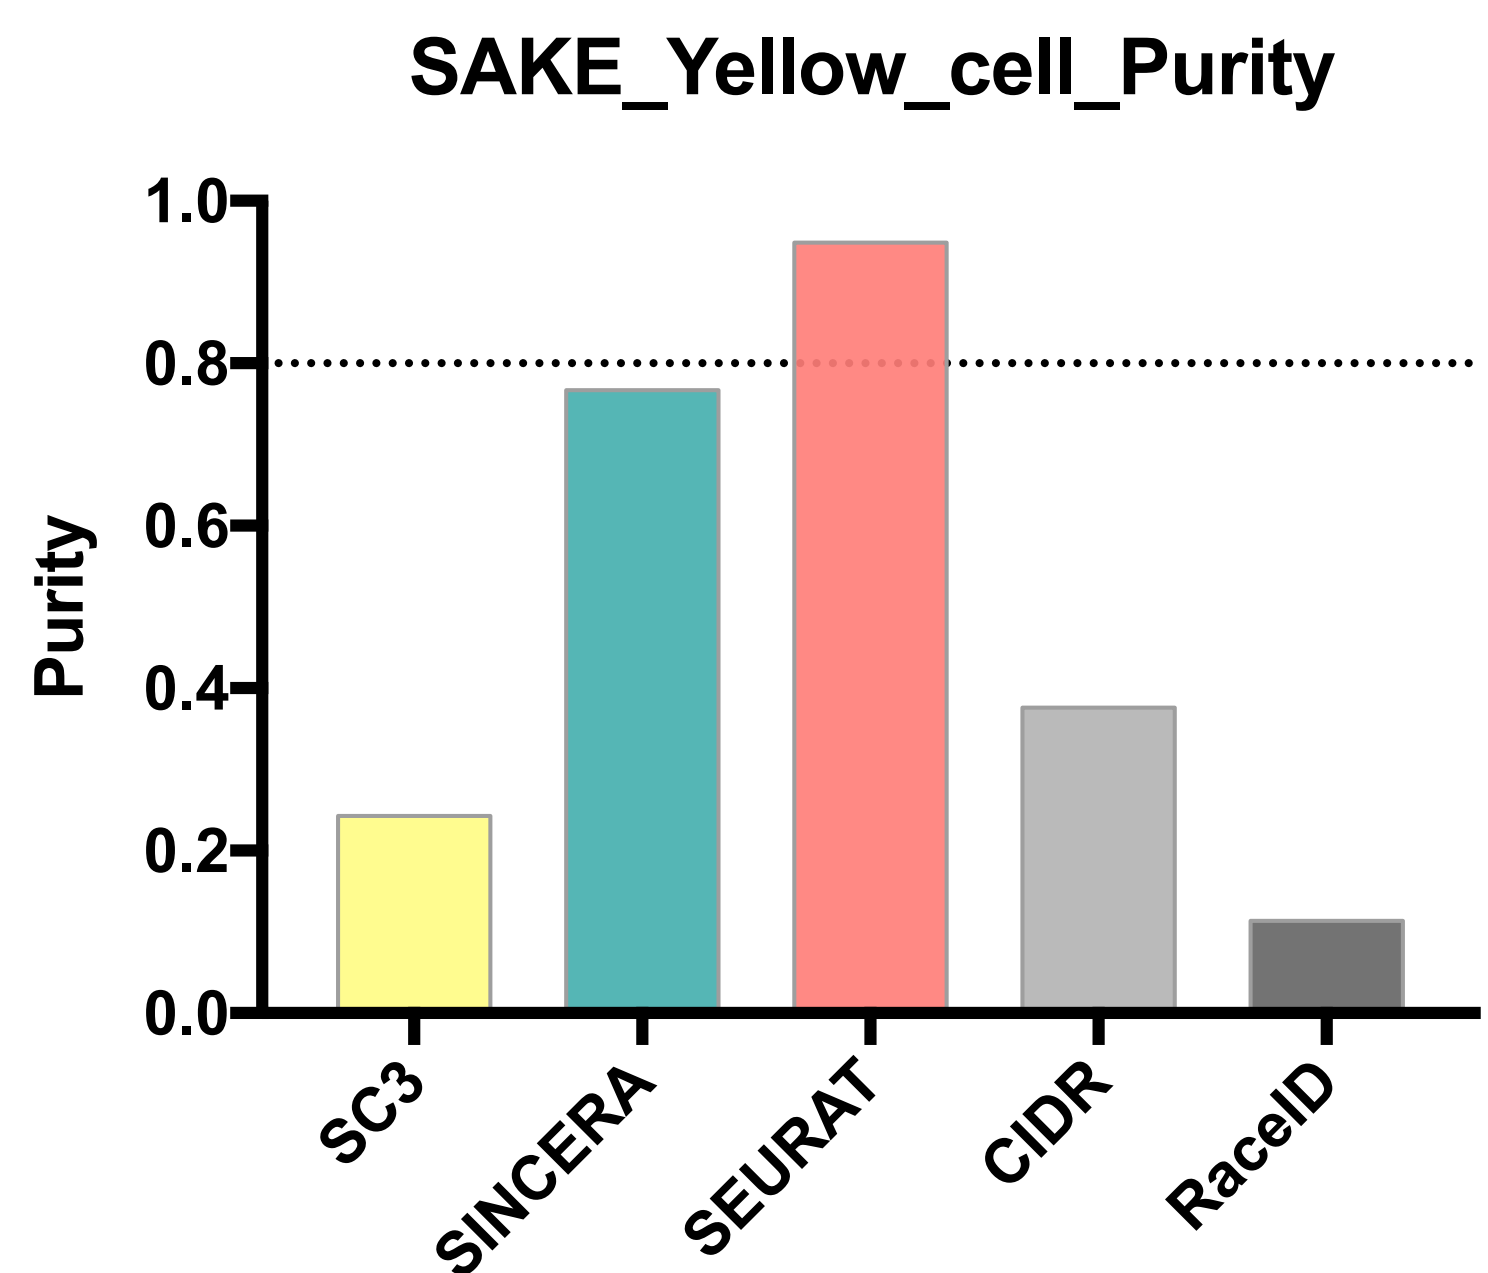

**Supplemental Fig. S11 | Assessment of other clustering methods on 451Lu 10X data and their ability to identify clusters enriched for cells in the potential transitional state (yellow cells).** SAKE clustering results were used as the reference for calculating **A)** Adjusted Rand Index (ARI), **B)** Normalized Mutual Information (NMI), **C)** Overall Purity, or **D)** Yellow cell specific Purity. While there was wide disagreement between each of the methods on the number of clusters present in the 451Lu 10x datasets, as measured by differences in ARI and NMI scores, we can see that some of the methods identified cells enriched for the yellow cells in the proposed transitional state. Specifically, SINCERA and SEURAT identified clusters that showed the highest enrichment for our yellow cell population.
