# Supplementary figures and images for: Single-cell RNA-seq analysis identifies markers of resistance to targeted BRAF inhibitors in melanoma cell populations
Source: HighWire-hosted journal article supplement (doi:10.1101/gr.234062.117), 2018-07-30

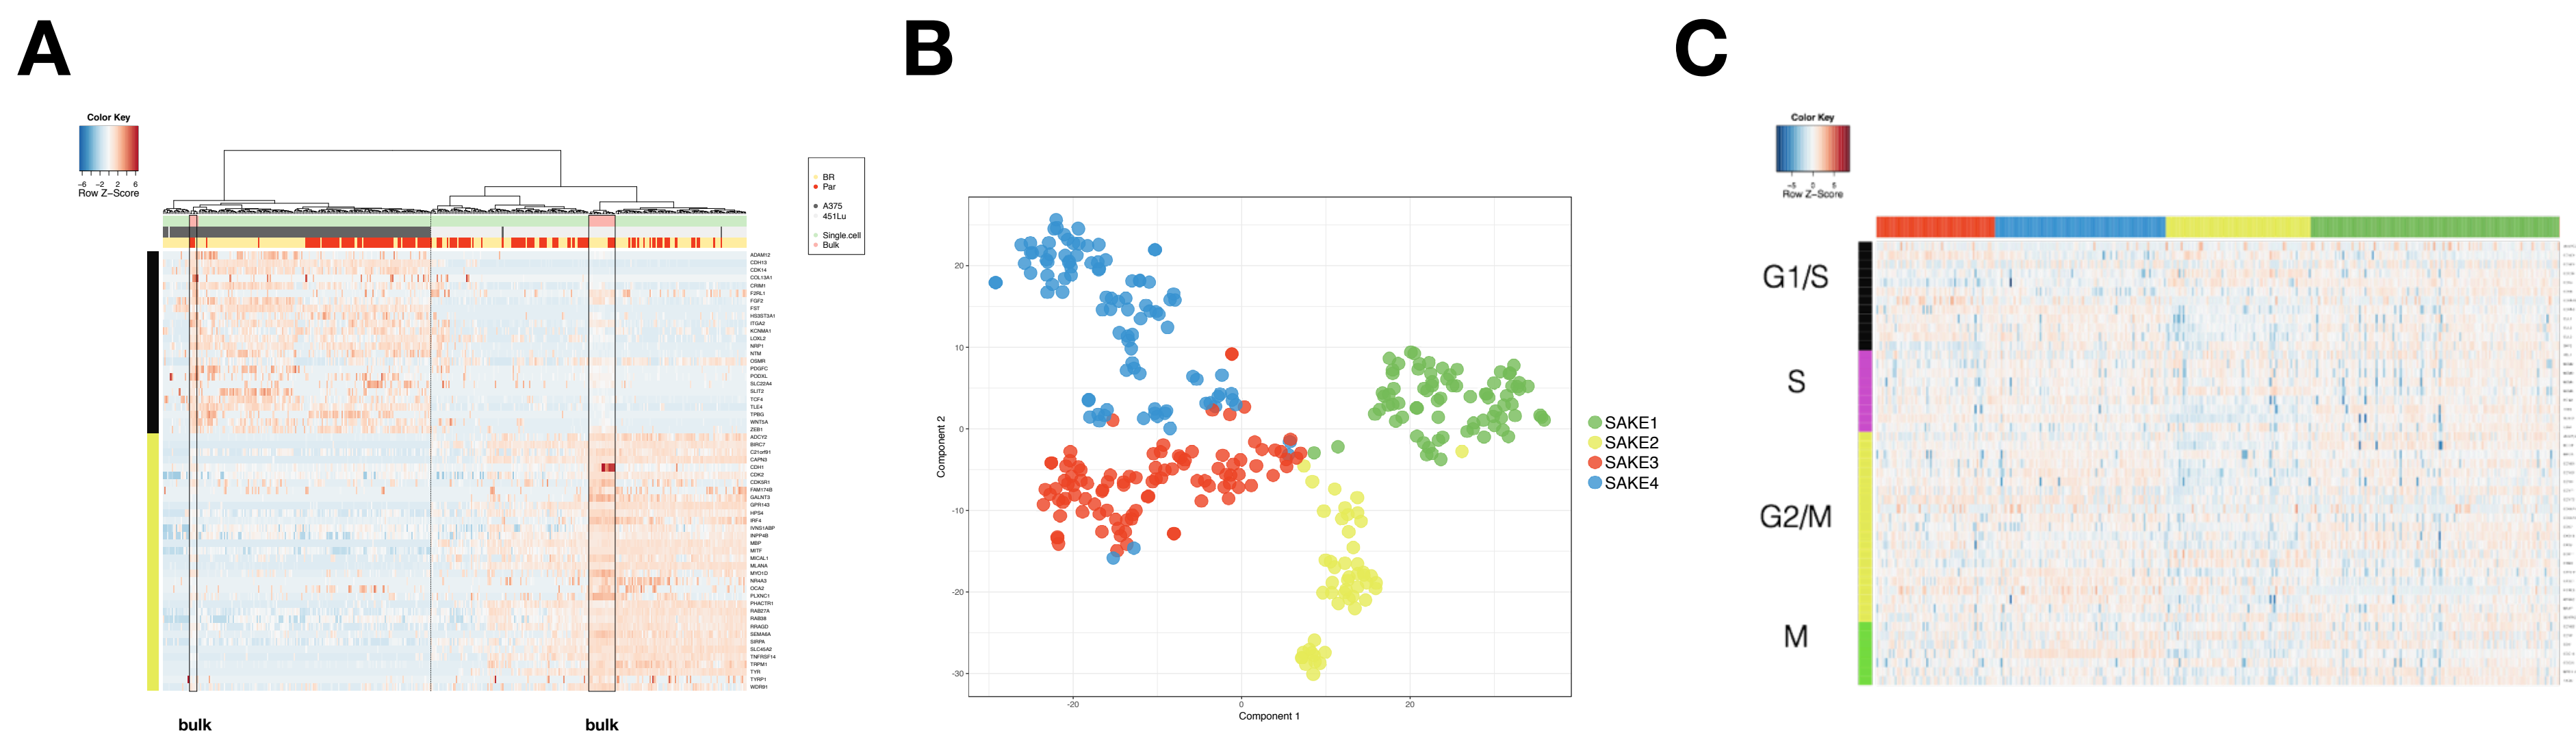

Supplement: Supplemental_Fig_S4.pdf [file Supplemental_Fig_S4.pdf]
